# Supplementary material
Source: publisher site journal article supplement (https://www.dovepress.com/article/236813)
Supplement: Supplementary file 1 [file get_supplementary_file.php]

**Supplementary material**

|  | | **Table S1 Reliability and total variance explained by the extended TPB scale** | | | | |
| --- | --- | --- | --- | --- | --- | --- |
| Factor | Items | | Loading | Cronbach's a | GLB coefficients | % of variance |
| **Intention** | 1. I want to exercise regularly | | 0.858 | 0.958 | 0.969 | 49.43 |
| 2. I am determined to start exercise regularly | | 0.921 |  |  |  |
| 3. I have planned to exercise regularly and prepare to start | | 0.904 |  |  |  |
| 4. I have planned when to exercise regularly | | 0.937 |  |  |  |
| 5. I have planned where to exercise regularly | | 0.914 |  |  |  |
| 6. I have decided what kind of exercise to take | | 0.946 |  |  |  |
| 7. I have planned the frequency of regular exercise every week | | 0.887 |  |  |  |
|  |  | |  |  |  |  |
| **Attitude** | 1. Exercise is very effective for controlling blood sugar | | 0.929 | 0.748 | 0.779 | 10.96 |
| 2. Exercise can effectively prevent the complications | | 0.883 |  |  |  |
| 3. Exercise is very effective for weight control | | 0.871 |  |  |  |
| 4. I feel physically comfortable after exercise | | 0.884 |  |  |  |
| 5. I feel emotionally comfortable after exercise | | 0.835 |  |  |  |
|  |  | |  |  |  |  |
| **Self-identity** | 1. I think I am good at exercising | | 0.877 | 0.752 | 0.778 | 4.57 |
| 2. I think I am in good health | | 0.681 |  |  |  |
| 3. I think I exercise regularly | | 0.883 |  |  |  |
| 4. People may think I don’t like exercise | | 0.683 |  |  |  |
|  |  | |  |  |  |  |
| **Subjective norm** | 1. People who are important to me think that I should exercise regularly | | 0.747 | 0.648 | 0.694 | 5.27 |
| 2. People who are important to me want me to exercise regularly | | 0.725 |  |  |  |
| 3. I feel pressure to make me exercise from people around me | | 0.612 |  |  |  |
|  |  | |  |  |  |  |
| **Descriptive norm** | 1. Many friends with T2D are exercising regularly | | 0.599 | 0.661 | 0.661 | 3.45 |
| 2. Many people are exercising regularly. | | 0.606 |  |  |  |
|  |  | |  |  |  |  |
| **PBC** | 1. I know what things will interfere with regular exercise | | 0.843 | 0.643 | 0.734 | 3.76 |
| 2. I've figured out how to solve the problems I might encounter during exercise | | 0.883 |  |  |  |
| 3. It’s totally up to me to exercise regularly | | 0.813 |  |  |  |
